# Supplementary material
Source: Royal Society of Chemistry journal article supplement (doi:10.1039/d6bm00320f)
Supplement: d6bm00320f1.pdf [file d6bm00320f1.pdf]

## Supplementary Information

### Colon Microenvironment Restorative Nano-armored Probiotics-Rosmarinic Acid Bioconjugation for Synergistic Alleviation of Inflammatory Bowel Disease

*Pengyu Chen*<sup>1,2,#</sup>, *Pandi Peng*<sup>1,#</sup>, *Junru Wang*<sup>1</sup>, *Xia Zhang*<sup>1</sup>, *Yuxin Guo*<sup>1</sup>, *Hao Yan*<sup>1,2</sup>, *Boyi Wang*<sup>1,2</sup>, *Kaiyu Zhang*<sup>1,2</sup>, *Chunyang Liu*<sup>1,2</sup>, *Tao Feng*<sup>1,\*</sup>, *Peng Li*<sup>1,3,\*</sup>

<sup>1</sup>State Key Laboratory of Flexible Electronics (LoFE), Xi'an Institute of Flexible Electronics, and Xi'an Institute of Biomedical Materials and Engineering, Northwestern Polytechnical University, Xi'an 710072, China

<sup>2</sup>Queen Mary University of London Engineering School, Northwestern Polytechnical University (NPU), Xi'an 710072, China

<sup>3</sup>Henan Institute of Flexible Electronics (HIFE) and School of Flexible Electronics, Henan University, Zhengzhou 450046, China

#Pengyu Chen and Pandi Peng contributed equally to the article.

\*Corresponding authors:

Professor Peng Li, PhD; Professor Tao Feng, PhD;

E-mail: [iamppli@nwpu.edu.cn](mailto:iamppli@nwpu.edu.cn) (P. L.); [iamtfeing@nwpu.edu.cn](mailto:iamtfeing@nwpu.edu.cn) (T.F.)

## Supplementary Figures

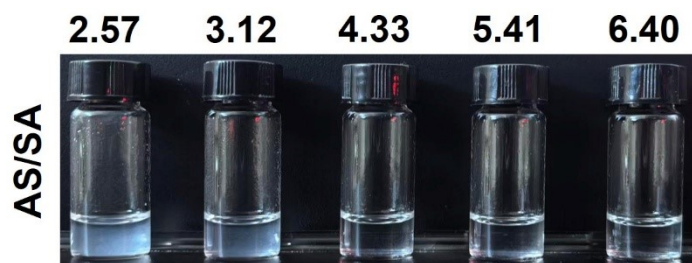

**Fig. S1.** The images of AS/SA at different pH values.

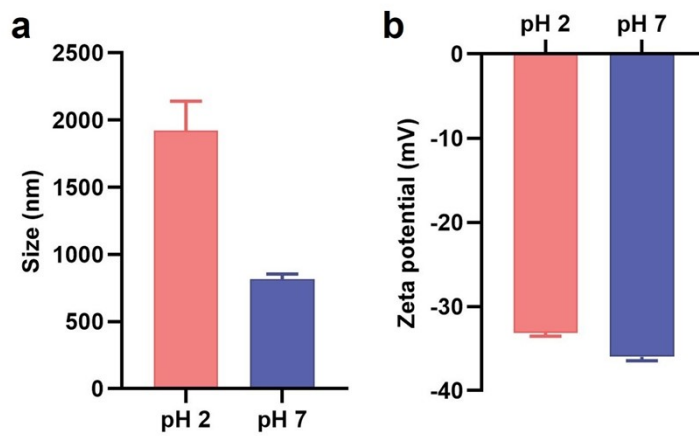

**Fig. S2.** The pH responsive ability of AS/SA coating. (a) The hydrated size of EcN-RA@AS/SA. (b) The zeta potential of EcN-RA@AS/SA.

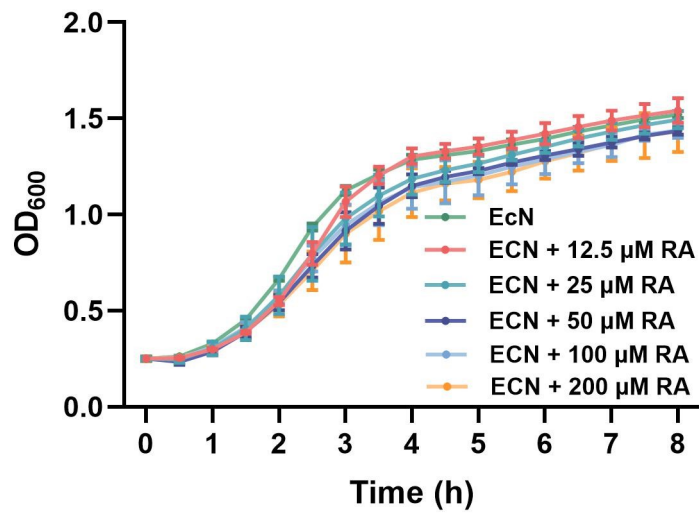

**Fig. S3.** The growth curves of *EcN* incubated in LB with different concentrations of rosmarinic acid.

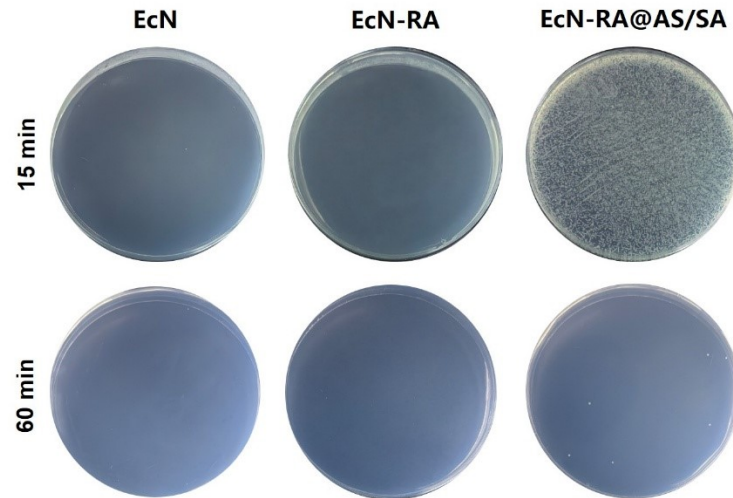

**Fig. S4.** Plates of SGF for probiotics at first 15 minutes and 60 minutes.

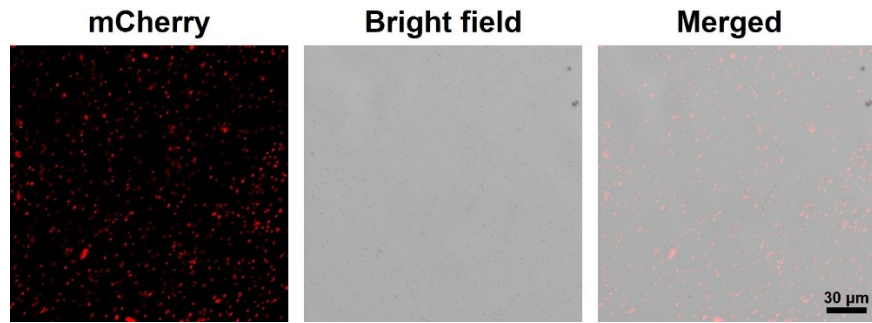

**Fig. S5.** Confocal imaging results of EcN transfected with pBBR1MCS2-Tac-mCherry.

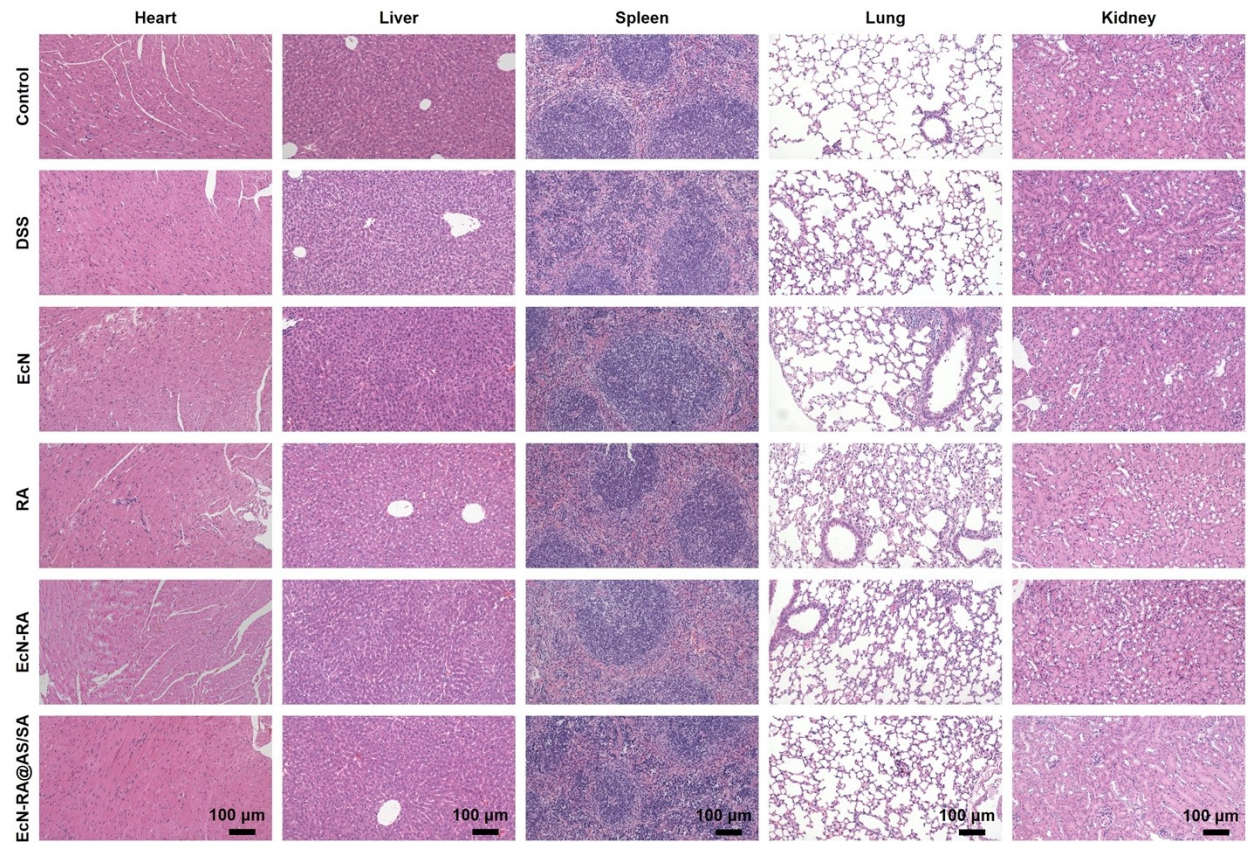

**Fig. S6.** The H&E staining of major organs (hearts, livers, spleens, lungs, and kidneys) for pathological examination.

**Equation S1.**

$$\text{Loading Efficiency} = \frac{C_0 - C_S}{C_0} \times 100\%$$

In this equation,

$C_0$ : Initial concentration of rosmarinic acid

$C_S$ : Uncoupled rosmarinic acid concentration in the supernatant after incubation

**Table S1.** The detail scoring criteria of DAI

| Body weight loss (%) | Blood                         | Stool consistency | Score |
|----------------------|-------------------------------|-------------------|-------|
| ≤1                   | Negative hemocult             | Normal            | 0     |
| 1-5                  |                               | Soft but formed   | 1     |
| 5-10                 | Positive hemocult             | Soft              | 2     |
| 10-15                |                               | Very soft         | 3     |
| >15                  | Blood traces in stool visible | Watery diarrhea   | 4     |

$$\text{DAI score} = (\text{Body weight loss score} + \text{Blood score} + \text{Stool consistency score})/3$$

**Table S2.** The detail scoring criteria of histological score

| Area of lesion (%) | Depth of lesion | Crypt damage              | Inflammation     | Score |
|--------------------|-----------------|---------------------------|------------------|-------|
| ≤1                 | Normal          | Normal                    | Normal           | 0     |
| 1-25               | Submucosa       | 1/3 crypts                | Mild             | 1     |
| 25-50              | Muscularis      | 2/3 crypts                | Moderate         | 2     |
| 50-75              | Serosa          | All, intact epithelium    | Severe           | 3     |
| >75                |                 | All, destroyed epithelium | Extremely severe | 4     |

Histological score = (Depth of lesion score + Crypt damage score + Inflammation score) × Area of lesion
